# Supplementary material
Source: HighWire-hosted journal article supplement (https://ejhp.bmj.com/highwire/filestream/153729/field_highwire_adjunct_files/0/ejhpharm-2022-003648supp001_data_supplement.pdf)
Supplement: ejhpharm-2022-003648supp001_data_supplement.pdf [file ejhpharm-2022-003648supp001_data_supplement.pdf]

Appendix 1. Level 1 assessment for all three modules.

- 
1. General and specific objectives were clearly defined
  2. The training's structure was precise
  3. The training's progression was linear and comprehensible
  4. The training's theme was useful for my profession
  5. The training was pleasant (communication, dynamism, the volume of the voice...)
  6. The facilitator was a good listener (ease of contact, answered questions, interactions...)
  7. I feel more competent after this training
  8. The tools used were appropriate
  9. The training was fun
  10. This type of training should be applied to other topics
-
